# Long-Term Glycemic Control and Neurological Function in IDDM Patients

DAVID R. McCANCE, MD  
A. BREW ATKINSON, MD  
DAVID R. HADDEN, MD  
LAURENCE KENNEDY, MD

**OBJECTIVE** — To examine the relationship between sensory modalities of neurological function and antecedent glycemic control in IDDM patients.

**RESEARCH DESIGN AND METHODS** — Examinations were conducted on 220 IDDM patients (age at onset <25 yr, duration <18 yr) for the presence or absence of the right or left ankle reflex and determination of vibration perception threshold at each medial malleolus and great toe using biothesiometry. These parameters were related to the concurrent HbA<sub>1c</sub> and to a mean of serial measurements (mean HbA<sub>1c</sub>) over the previous 6 yr.

**RESULTS** — Ankle reflexes were absent in 39 (right ankle) and 41 (left ankle) patients, respectively. Mean (right + left) ankle and toe VPTs were  $8.7 \pm 3.6$  and  $6.3 \pm 4.2$  (mean  $\pm$  SD) (arbitrary units), respectively. Both the mean and concurrent HbA<sub>1c</sub> were significantly different in patients with absent ankle reflexes ( $11.6 \pm 1.9$  and  $12.2 \pm 2.8\%$ , respectively) compared with present ankle reflexes ( $10.3 \pm 1.7$ ,  $10.3 \pm 2.1\%$ ) ( $P < 0.0001$ ). Similarly, a present ankle reflex was related to mean HbA<sub>1c</sub> arbitrarily divided into groups <10, 10–12, >12% ( $P = 0.0009$ ). In contrast, mean ankle VPT ( $8.0 \pm 2.2$ ,  $8.8 \pm 3.1$ , and  $10.3 \pm 6.2$ ) and toe VPT ( $5.5 \pm 2.2$ ,  $6.1 \pm 2.9$ , and  $8.5 \pm 8.2$ ) did not increase significantly with poor glycemic control ( $P > 0.05$ ). Age, right ankle reflex, retinopathy, 24-h urinary albumin excretion rate, and erect systolic blood pressure were the only independent variables predicting the toe VPT using linear regression analysis.

**CONCLUSIONS** — These findings support a role for glycemic control in neurological dysfunction in IDDM patients, but also suggest that other unknown factors may be involved.

From the Sir George E. Clark Metabolic Unit, Royal Victoria Hospital, Belfast, Northern Ireland.

Address correspondence and reprint requests to David R. McCance, MD, Sir George E. Clark Metabolic Unit, Royal Victoria Hospital, Belfast, BT12 6BA, Northern Ireland, UK.

Received for publication 22 June 1992 and accepted in revised form 29 April 1993.

IDDM, insulin-dependent diabetes mellitus; VPT, vibration perception threshold; CV, coefficient of variation; AER, albumin excretion rate; BP, blood pressure; sBP, systolic blood pressure; ANOVA, analysis of variance.

The role of long-term hyperglycemia in the development and progression of diabetic neuropathy is poorly understood. The lack of a reliable estimate of long-term glycemic control is a serious deficiency of many studies, which have reached conflicting conclusions (1–4). In contrast to sensory nerve conduction, motor conduction is rapidly reversible with improved metabolic control and therefore, may reflect a direct biochemical or physiological component of metabolism rather than a structural abnormality. This suggests that sensory conduction may be the more relevant clinical modality to relate to long-term glycemia. This study examines the relationship between several sensory modalities of neurological function and antecedent glycemic control in 220 IDDM patients.

## RESEARCH DESIGN AND

**METHODS** — Patient identification and recruitment have been described previously (5). Questions were asked of 220 IDDM patients (age at onset <25 yr, duration <18 yr) for symptoms of somatic and autonomic neuropathy. None admitted to excess alcohol consumption or to solvent or toxin abuse. Examination included elicitation of lower limb reflexes, which were defined as absent, present, or present with reinforcement. The latter two groups were combined for the purpose of analysis.

VPTs (mean of 3 readings) were measured at each great toe and medial malleolus using a biothesiometer (Bio-medical Instruments, Newbury, Ohio). The mean intraindividual CV of ankle and toe measurements was 7.8 and 12.1%, respectively. Readings range from 0 to 50 on a linear scale: low values indicate a weak stimulus. Retinopathy was assessed by retinal photography and graded by increasing severity from grade 0 (no retinopathy) to grade 6 (vasoproliferation) (6).

After the examination, venepuncture was obtained for HbA<sub>1c</sub> estimation

Table 1—Ankle reflex examined in relation to mean HbA<sub>1c</sub>

|                            | Right ankle reflex |          | Left ankle reflex |          |
|----------------------------|--------------------|----------|-------------------|----------|
|                            | Absent*            | Present† | Absent*           | Present‡ |
| Mean HbA <sub>1c</sub> (%) |                    |          |                   |          |
| <10                        | 6                  | 81       | 8                 | 79       |
| 10–12                      | 21                 | 75       | 22                | 74       |
| >12                        | 12                 | 24       | 11                | 25       |

\*Degrees of freedom = 2.

†P = 0.0009.

‡P = 0.0082.

(agar gel electroendosmosis, Corning Medical, Halsted, England, UK) (normal range 3.6–7.2%). A single 24-h and a timed overnight urine sample were obtained at home from each patient immediately before the clinic visit for calculation of AER in  $\mu\text{g}/\text{min}$ . Microalbuminuria was defined as  $20 \leq \text{AER} < 200 \mu\text{g}/\text{min}$ .

Serial HbA<sub>1c</sub> and plasma glucose values were abstracted from each patient's medical chart: HbA<sub>1c</sub> values were measured routinely at our outpatient clinic since November 1980, and plasma glucose values (postprandial, usually midmorning, samples) were available from the time of diagnosis of diabetes. The mean number of HbA<sub>1c</sub> measurements per patient was 14 (range 2–34) and of glucose was 33 (range 3–51). From these values, mean HbA<sub>1c</sub> and mean glucose were calculated for each patient.

### Statistical analysis

Parameters of long-term glycemia were examined by the ankle reflex (present/absent) using a Kruskal-Wallis one-way ANOVA and Spearman's correlation coefficient (SPSS). On clinical grounds, patients were divided arbitrarily into 3 groups: mean HbA<sub>1c</sub> <10% (good control), 10–12% (intermediate), and >12% (poor control), for examination by the ankle reflex and VPT. Variables independently associated with toe VPT were determined by linear regression analysis.

**RESULTS**— Of the 220 patients, 5 admitted to persistent lower limb paraesthesia; 4 to frequent episodes of fainting or dizziness on standing; 2 had unexplained diarrhea, constipation, or micturitional difficulty; and 2 patients suffered from chronic leg or foot ulceration. Three of 109 males admitted to sexual difficulty. All of the symptomatic patients had absent ankle reflexes and the highest ankle and toe VPTs.

Ankle reflexes were absent in 39 (right) and 41 (left) patients, respectively (Table 1). Mean  $\pm$  SD ankle and toe VPT were  $8.7 \pm 3.6$  and  $6.3 \pm 4.2$ , respectively.

Mean HbA<sub>1c</sub>, concurrent HbA<sub>1c</sub>, and mean glucose were significantly higher in patients with an absent reflex ( $11.6 \pm 1.9\%$ ,  $12.2 \pm 2.8\%$ , and  $11.6 \pm 3.0 \text{ mM}$ ) compared with a present ankle reflex ( $10.3 \pm 1.7\%$ ,  $10.3 \pm 2.1\%$ , and  $10.4 \pm 3.0 \text{ mM}$ ) and a right ankle reflex ( $P < 0.001$ ,

$P < 0.0001$ ,  $P < 0.05$ ), respectively. The 3 categories of mean HbA<sub>1c</sub> were significantly associated with ankle reflex measurements (Table 1). In contrast, neither mean (right + left) ankle nor mean toe VPT rose significantly with increasing HbA<sub>1c</sub> (Table 2). The orthostatic fall in BP ( $\leq 15 \text{ mmHg}$ ), as a possible reflection of subclinical autonomic neuropathy, was significantly correlated with both mean and concurrent HbA<sub>1c</sub> ( $P < 0.01$ ,  $P < 0.05$ ), respectively. Mean HbA<sub>1c</sub> correlated significantly with both mean ankle and toe VPT (ankle:  $r = 0.14$ ,  $r = 0.17$ ,  $P < 0.05$ ), whereas the concurrent HbA<sub>1c</sub> correlated only with toe VPT (toe:  $r = 0.14$ ,  $P < 0.05$ ). No correlation was found between mean glucose and VPT.

Patients with absent ankle reflexes had significantly higher 24-h and overnight AERs and more severe retinopathy. VPT also increased with severity of retinopathy ( $P < 0.0001$ ), but the association with microalbuminuria was not significant ( $P > 0.05$ ). Age ( $P = 0.05$ ), retinopathy ( $P = 0.01$ ), 24-h AER ( $P = 0.04$ ), right ankle reflex ( $P = 0.001$ ), and erect sBP ( $P = 0.04$ ) were significant variables. These variables were independently associated with toe VPT using linear regression analysis, whereas age at onset of diabetes, diabetes duration, sex, mean and concurrent HbA<sub>1c</sub>, mean plasma glucose, supine sBP, number of episodes of ketosis, number of visits per year to the outpatient clinic, total daily insulin dose, family history of

Table 2—Right and left ankle and toe VPTs examined in relation to mean HbA<sub>1c</sub>

|                            | n  | Right and left ankle VPT* | Right and left toe VPT† |
|----------------------------|----|---------------------------|-------------------------|
| Mean HbA <sub>1c</sub> (%) |    |                           |                         |
| <10                        | 88 | $8.0 \pm 2.2$             | $5.5 \pm 2.2$           |
| 10–12                      | 96 | $8.8 \pm 3.1$             | $6.1 \pm 2.9$           |
| >12                        | 36 | $10.3 \pm 6.2$            | $8.5 \pm 8.2$           |

Data are means  $\pm$  SD.

\*P = 0.2050.

†P = 0.0612.

diabetes, cigarette consumption, and percentage of ideal body weight were not significant.

**CONCLUSIONS**—Collectively, the similar association of mean HbA<sub>1c</sub> and concurrent HbA<sub>1c</sub> with ankle reflex measurements, the weak correlation of ankle and toe VPT with glycemic control, and the nonsignificant association of mean HbA<sub>1c</sub> with toe VPT using linear regression, although not denying a role for glycemia in the development of neurological dysfunction, suggests a limited role for hyperglycemia in its progression. Alternatively, these results could be interpreted as indicating that neurological dysfunction may be amenable to improved control. The association between glycemic control and a postural fall in sBP would support a role for hyperglycemia in the pathogenesis of autonomic neuropathy (6).

Although commonly used to assess vibration perception, inability to control applied pressure may reduce the objectivity of biothesiometry measure-

ments. This variability may have limited our ability to demonstrate an association with glycemia, although the progressive increase in VPT with more severe retinopathy suggests that the thresholds do reflect subclinical neurological dysfunction. Other more recently designed instruments have been described (7) and should also be evaluated in relation to long-term glycemia and the natural history of diabetic neuropathy.

In summary, these findings add further support to the hypothesis that neurological dysfunction may not simply reflect a cumulative glycemic process. The relevance of other risk or perpetuating factors must also be considered.

#### References

1. Boulton AJM, Worth RC, Drury J, Hardisty CA, Wolf E, Cudworth AG, Ward JD: Genetic and metabolic studies in diabetic neuropathy. *Diabetologia* 26:15–19, 1984
2. Young RJ, MacIntyre CCA, Martyn CN, Prescott RJ, Ewing DJ, Smith AF, Viberti G, Clarke BF: Progression of subclinical neuropathy in young patients with type I (insulin-dependent) diabetes. *Diabetologia* 29:156–61, 1986
3. Maser RE, Nielsen VK, Dorman JS, Drash AL, Becker DJ, Orchard T: Measuring subclinical neuropathy: does it relate to clinical neuropathy: Pittsburgh Epidemiology of Diabetes Complications Study V. *J Diabetic Complications* 5:6–12, 1991
4. The DCCT Research Group: Factors in the development of diabetic neuropathy: baseline analysis of neuropathy in feasibility phase of diabetes control and complications trial (DCCT). *Diabetes* 37:476–81, 1988
5. McCance DR, Atkinson AB, Hadden DR, Archer DB, Kennedy L: Long-term glycaemic control and diabetic retinopathy. *Lancet* 2:824–28, 1989
6. Ziegler D, Ciemir I, Mayer P, Wiefels K, Gries FA: The natural course of peripheral and autonomic neural function during the first two years after diagnosis of type 1 diabetes. *Klin Wochenschr* 66:1085–92, 1988
7. Vinik AI, Holland MT, Le Beau JM, Liuzzi FJ, Stansberry KB, Colen LB: Diabetic neuropathies. *Diabetes Care* 15:1926–75, 1992
